# Supplementary material
Source: Springer Nature journal article supplement (https://www.springermedizin.de/resource/supplementary/12904_2013_206_MOESM1_ESM.pdf/9517764)
Supplement: MOESM1 [file 9517764]

Patients identified by  
Specialist services –  
“Surprise question”

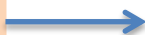

Case conference at  
GP surgery

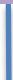

Development of  
palliative care plan –  
Case review  
Task allocation

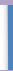

Refine plan with  
patient

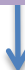

Enact plan
